# Supplementary material for: Convergent Evolution of Fern-Specific Mitochondrial Group II Intron atp1i361g2 and Its Ancient Source Paralogue rps3i249g2 and Independent Losses of Intron and RNA Editing among Pteridaceae
Source: PubMed Central journal article supplement — Genome Biol Evol. 2016 Aug 4;8(8):2505–19. doi: 10.1093/gbe/evw173 (PMC5010907; doi:10.1093/gbe/evw173), 2016-08-04
Supplement: supp_evw173_Supplementary_material_REVISION-2_clear.pdf [file supp_evw173_Supplementary_material_REVISION-2_clear.pdf]

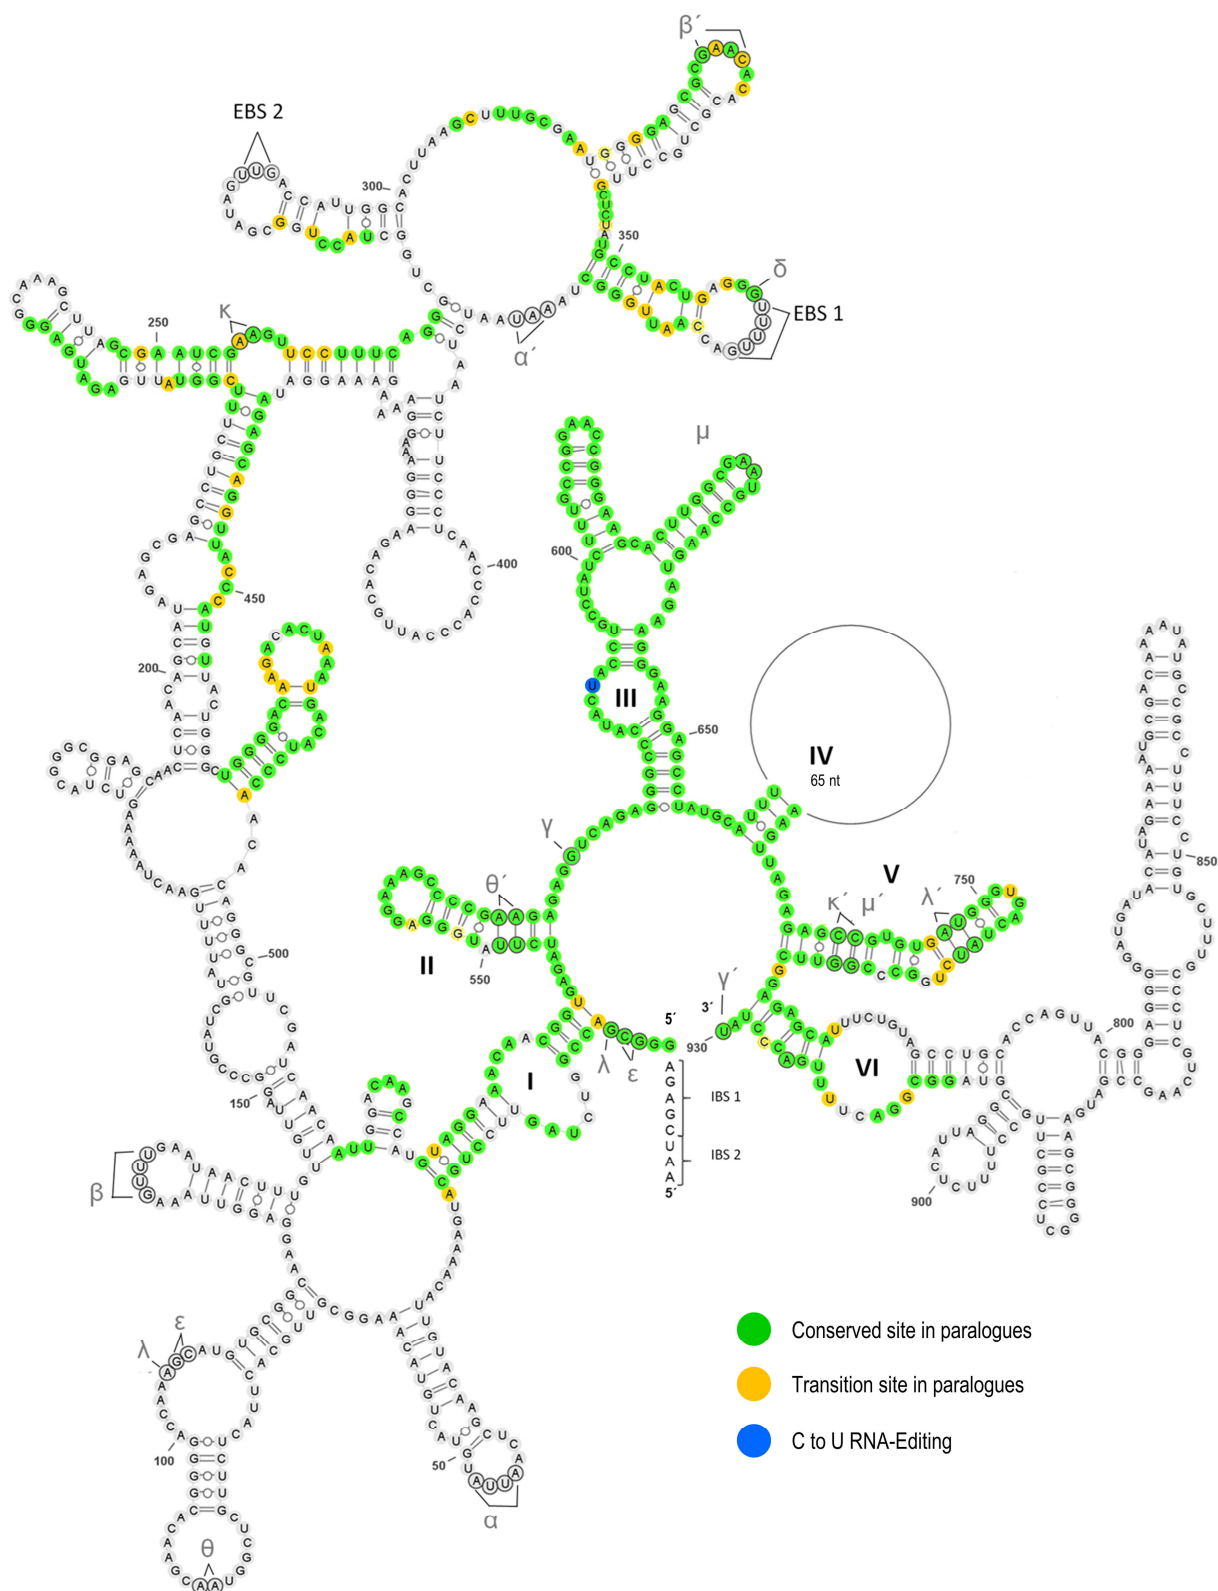

**Supplementary figure 1.** Secondary structure model of rps3i249g2 in *Pteris cretica*. Display is analogous to figure 6.

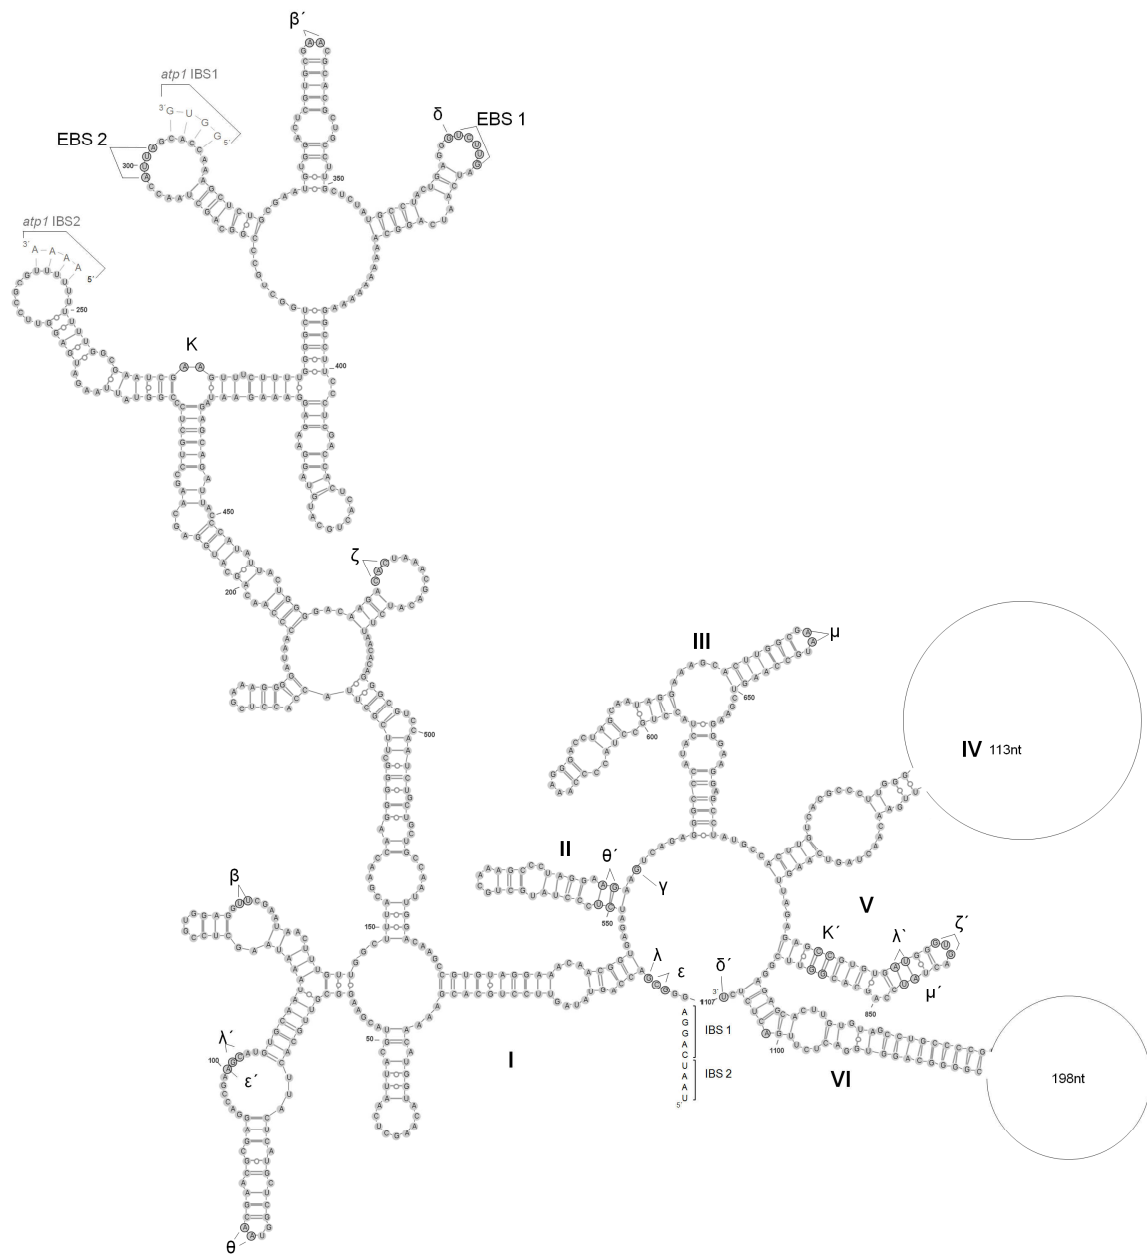

**Supplementary figure 2.** Secondary structure model of *rps3i249g2* from *Phlegmariusus squarrosus* shows the six radiating domains (Roman numbers) of this group II intron with their tertiary interaction sites (Greek letters and black circles around nucleotides) and the exon binding sites 1 & 2 (EBS) and intron binding sites 1 & 2 (IBS). Additionally *atp1i361g2* IBS 1 & 2 consensus sequence from monilophytes and the lycophyte *Phlegmariusus squarrosus* are displayed in grey.

a)

|                                  | Domain II                                 | Domain II lengths & similarities |
|----------------------------------|-------------------------------------------|----------------------------------|
| <i>Polypodium</i> atp1i361       | ATCTTCGCGGGG---GAAAAGGAAAGCCCGGAGAGAGGTCA | 29 bp 69%                        |
| rps3i249                         | ATCTTA--TGGGG-----AGAAAAGCCCGGAGAGAGGTCA  | 25 bp                            |
| <i>Ch. sinuata</i> rps3i249      | ATCTTC--TGGGA--GAAAAGCAAAGCCCGAAGAGAGGTCA | 30 bp                            |
| <i>Ad. raddianum</i> rps3i249    | ATCTTC--TGAGA-----GAAAAGCCCGAAGAGAGGTCA   | 25 bp                            |
| <i>Ad. peruvianum</i> rps3i249   | ATCTTC--TGGGA-----GAAAAGCCCTGAAGAGAGGTCA  | 25 bp                            |
| <i>Ad. cap.-ven.</i> rps3i249    | ATCTTC--TGGGA-----GAAAAGCCCGAAGAGAGGTCA   | 25 bp                            |
| <i>Ac. aureum</i> rps3i249       | AACTTA--TGGGA-----GAAAAGCCCAAAGAGAGGTCA   | 25 bp                            |
| <i>P. sulphurea</i> atp1i361     | ATCTTA--TAGGGAGAGGGAGAAAAGCCCGAAGAGAGGTCA | 32 bp                            |
| rps3i249                         | ATCTTA--TGGGAGNNNAAGAAAGCCCGAAGAGAGGTCA   | 131 bp 21%                       |
| <i>Pt. cretica</i> atp1i361      | ATCTTC--TAGGGAGAGGGAGAAAAGCCCGAAGAGAGGTCA | 32 bp                            |
| rps3i249                         | ATCTTA--TGGGA-----GAAAAGCCCGAAGAGAGGTCA   | 25 bp 69%                        |
| <i>D. antarctica</i> atp1i361    | ATCTTCGCGGGG-----GAAAAGCCCGGAGAGAGGTCA    | 27 bp                            |
| rps3i249                         | ATCTTA--TGGGG-----GAAAAGCCCTAGAAAGAGTCA   | 25 bp 70%                        |
| <i>Az. filiculoides</i> atp1i361 | ATCTTCGCGGGG-----GAAAAGCCCGAAGAAAGTCA     | 27 bp                            |
| rps3i249                         | ATCTTA--TGGGA-----GAAAAGCCCGAAGAAAGTCA    | 25 bp 85%                        |
| <i>T. barbara</i> atp1i361       | ATCTTCGCGGGG-----GAAAAGCCCTATGAAGAA-TCA   | 27 bp                            |
| rps3i249                         | ATCTTA--TAGGG-----GAAAAGCCCTAGGAAGAGTCA   | 25 bp 77%                        |
| <i>An. madagasc.</i> atp1i361    | ATCTTCGCGGGG-----GAAAACCTTAGGAAGAGTAA     | 27 bp                            |
| rps3i249                         | ATCTTA--TAGG-----GAAAAGCCCTAGGAAGAGTCA    | 24 bp 75%                        |

b)

|                                  | Domain III                                                                                          | Similarities in percent      |
|----------------------------------|-----------------------------------------------------------------------------------------------------|------------------------------|
| <i>Polypodium</i> atp1i361       | GAGGGCCATACCACTGCCTACCTTTG---CCGGAACC-----GGGAAG---CACTTGGCG---AATGCCAA---GTAGAG---GGAAAGAGCCTAC    | <70 <75 <80 <85 <90 <95 <100 |
| rps3i249                         | GAGGGCCATACCACTGCCTACCTTTG---CCGGAACC-----GGGAAG---CACTTGGCG---AATGCCAA---GTAGAG---GGAAAGAGCCTAC    |                              |
| <i>Ch. sinuata</i> rps3i249      | GAGGGCCATACCACTGCCTACCTTTG---CCGGAACC-----GGGAAG---CACTTGGCG---AATGCCAA---GTAGAG---GGAAAGAGCCTAC    |                              |
| <i>Ad. raddianum</i> rps3i249    | GAGGGCCATACCACTGCCTACCTTTG---CCGGAACC-----GGGAAG---CACTTGGCG---AATGCCAA---GTAGAG---GGAAAGAGCCTAC    |                              |
| <i>Ad. peruvianum</i> rps3i249   | GAGGGCCATACCACTGCCTACCTTTG---CCGGAACC-----GGGAAG---CACTTGGCG---AATGCCAA---GTAGAG---GGAAAGAGCCTAC    |                              |
| <i>Ad. cap.-ven.</i> rps3i249    | GAGGGCCATACCACTGCCTACCTTTG---CCGGAACC-----GGGAAG---CACTTGGCG---AATGCCAA---GTAGAG---GGAAAGAGCCTAC    |                              |
| <i>Ac. aureum</i> rps3i249       | GAGGGCCATACCACTGCCTACCTTTG---CCGGAACC-----GGGAAG---CACTTGGCG---AATGCCAA---GTAGAG---GGAAAGAGCCTAC    |                              |
| <i>P. sulphurea</i> atp1i361     | GAGGGCCATACCACTGCCTACCTTTG---CCGGAACC-----GGGAAG---CACTTGGCG---AATGCCAA---GTAGAG---GGAAAGAGCCTAC    |                              |
| rps3i249                         | GAGGGCCATACCACTGCCTACCTTTG---CCGGAACC-----GGGAAG---CACTTGGCG---AATGCCAA---GTAGAG---GGAAAGAGCCTAC    |                              |
| <i>Pt. cretica</i> atp1i361      | GAGGGCCATACCACTGCCTACCTTTG---CCGGAACC-----GGGAAG---CACTTGGCG---AATGCCAA---GTAGAG---GGAAAGAGCCTAC    |                              |
| rps3i249                         | GAGGGCCATACCACTGCCTACCTTTG---CCGGAACC-----GGGAAG---CACTTGGCG---AATGCCAA---GTAGAG---GGAAAGAGCCTAC    |                              |
| <i>D. antarctica</i> atp1i361    | GAGGGCCATACCACTGCCTACCTTTG---AGGAACC-----GGGAAG---CACTTGGCG---AATGCCAA---GTAGAG---GGAAAGAGCCTAC     |                              |
| rps3i249                         | GAGGGCCATACCACTGCCTACCTTTG---AGGAACC-----GGGAAG---CACTTGGCG---AATGCCAA---GTAGAG---GGAAAGAGCCTAC     |                              |
| <i>Az. filiculoides</i> atp1i361 | GAGGGCCATACCACTGCCTACCTTTG---AGGAACC-----GGGAAG---CACTTGGCG---AATGCCAA---GTAGAG---GGAAAGAGCCTAC     |                              |
| rps3i249                         | GAGGGCCATACCACTGCCTACCTTTG---AGGAACC-----GGGAAG---CACTTGGCG---AATGCCAA---GTAGAG---GGAAAGAGCCTAC     |                              |
| <i>T. barbara</i> atp1i361       | GAGGGCCATACCACTGCCTACCTTTG---AGGAACC-----GGGAAG---CACTTGGCG---AATGCCAA---GTAGAG---GGAAAGAGCCTAC     |                              |
| rps3i249                         | GAGGGCCATACCACTGCCTACCTTTG---AGGAACC-----GGGAAG---CACTTGGCG---AATGCCAA---GTAGAG---GGAAAGAGCCTAC     |                              |
| <i>An. madagasc.</i> atp1i361    | GAGGGCCATACCACTGCCTACCTTTG---AAA-AGGAACC-----GGGAAG---CACTTGGCG---AATGCCAA---GTAGAG---GGAAAGAGCCTAC |                              |
| rps3i249                         | GAGGGCCATACCACTGCCTACCTTTG---GGGAACC-----GGGAAG---CACTTGGCG---AATGCCAA---GTAGAG---GGAAAGAGCCTAC     |                              |

c)

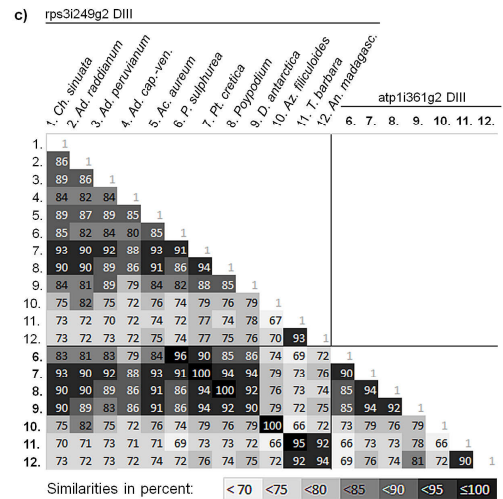

**Supplementary figure 3.** Sequence alignment of atp1i361g2 and rps3i249g2 domains II (a) and III (b) of selected fern species as displayed in figures 7 and 8. A unique large sequence insertion in rps3i249g2 domain II of *Pityrogramma sulphurea* is represented by NNN. Sequence similarities are given for pairwise comparisons of the short domains II of the two intron paralogues next to the alignment. A similarity matrix for the larger domains III is shown top right (c), demonstrating high similarities of the two paralogues in the bottom left rectangle of the matrix. The atp1i361g2 paralogues are labelled in bold. Full taxon names are: *Cheilanthes sinuata* (1), *Adiantum raddianum* (2), *Adiantum peruvianum* (3), *Adiantum capillus-veneris* (4), *Acrostichum aureum* (5), *Pityrogramma sulphurea* (6), *Pteris cretica* (7), *Polypodium vulgare* (atp1i361g2) & *cambricum* (rps3i249g2) (8), *Dicksonia antarctica* (9), *Azolla filiculoides* (10), *Todea barbara* (11) and *Angiopteris madascariensis* (12).

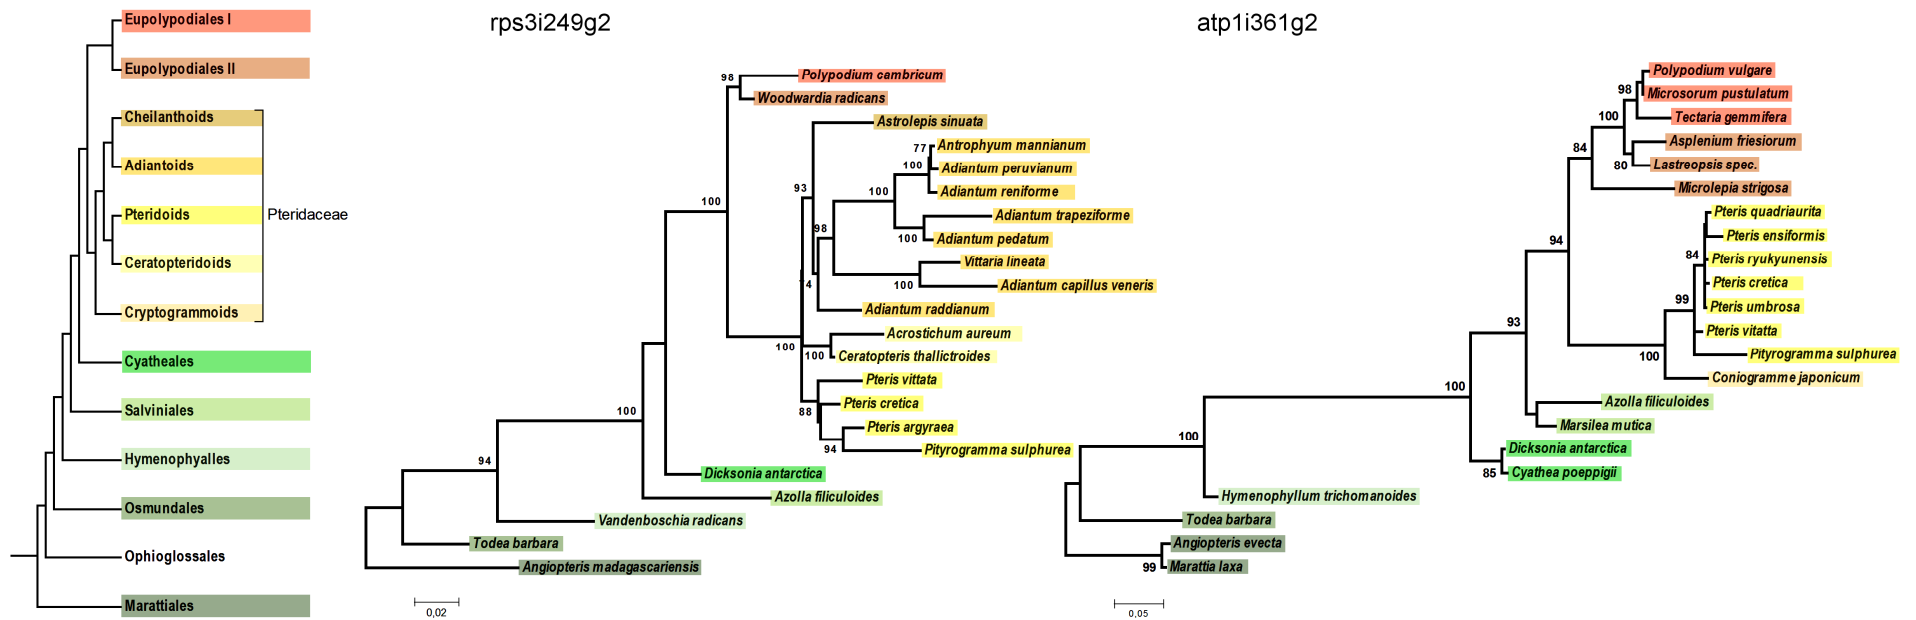

**Supplementary figure 4.** Phylogenetic analysis of the rps3i249g2 and atp1i361g2 was generated using maximum likelihood analysis. Each dataset underwent 1000 bootstrap repeats. As substitution model GTR+I+G4 was used. Bootstrap support below 70% are not shown. The leptosporangiate fern topology was created based on a multi-locus chloroplastid dataset shown in Figure 2 and 3. Species were colored respective to the order, suborder or subclade of family they belong to. Incongruences respective the taxon-sampling for the one or the other intron are due to missing data.

**Supplementary Table 1.** Oligonucleotide primer sequences. All primers which were used in this study and their respective sources are listed below. Primer names ending “up” or “do” are forward or reverse primer, respectively. Primers binding in introns are named with “intron”. Some exon primers (“edit”) fit known editing sites in their sequence and are used to selectively amplify edited cDNA.

| Name         | Locus        | Sequence from 5' to 3'             | Study                     |
|--------------|--------------|------------------------------------|---------------------------|
| rbcL_up_pry  | <i>rbcL</i>  | ATGTCACCACAAACGGAGACTAAAGC         | Pryer et al. (2004)       |
| rbcL_do_pry  | <i>rbcL</i>  | TCAGGACTCCACTTACTAGCTTCACG         | Pryer et al. (2004)       |
| atpB_up_pry  | <i>atpB</i>  | AATGTTACTTGTGAAGTWCAACAAT          | Pryer et al. (2004)       |
| atpB_do_pry  | <i>atpB</i>  | ATTCCAAACWATTTCGATTWGGAG           | Pryer et al. (2004)       |
| atpA_up_pelz | <i>atpA</i>  | GARCARGTTCGACAGCAAGT               | Schuettpelz et al. (2006) |
| atpA_do_pelz | <i>atpA</i>  | GTATAGGTTCRARTCCTATTGGACG          | Schuettpelz et al. (2006) |
| rps19_up     | <i>rps19</i> | GRTTGGTCATAAATYTGAGAG              | This study                |
| rpl16_do     | <i>rpl16</i> | TATCTGCSAARAYTCTTACCC              | This study                |
| rps3_upex1   | <i>rps3</i>  | RTMAATCCGATTTCAAGTCAGA             | This study                |
| rps3_upex2   | <i>rps3</i>  | GGTGTATTATTCATCATTYYCC             | This study                |
| rps3_do2ex3  | <i>rps3</i>  | CGTAATTTTCCTTCAGTAATCC             | This study                |
| rps3_do3ex2  | <i>rps3</i>  | GGRAATGATGAATAATACACC              | This study                |
| rps3_upin1   | <i>rps3</i>  | GACCGGTCTAGTTYCTGC                 | This study                |
| rps3_doDV    | <i>rps3</i>  | RTGCTCTCYGAACCGKGCTRG              | This study                |
| rps3 ex2upc  | <i>rps3</i>  | TCTTTTTTCTAGTTCAACGACG             | This study                |
| rps3 i2do1   | <i>rps3</i>  | CAGAGCGTGACAAATACATAGG             | This study                |
| rps3 ex3doc  | <i>rps3</i>  | TCYTCTCCAGCAACAATGAC               | This study                |
| atp1_up      | <i>atp1</i>  | GATGGAAYTGCACGTGTTTATGG            | Knie et al. (2015)        |
| atp1_do      | <i>atp1</i>  | ACRTCYCCAGCTTRKRTTTC               | Knie et al. (2015)        |
| atp1_do2     | <i>atp1</i>  | YAAAAGGTAGCCAGTTGASTG              | This study                |
| atp1_do3     | <i>atp1</i>  | CASTCAACTGGCTACCTTTTR              | This study                |
| atp1cDup     | <i>atp1</i>  | ATGCTAGGTCGTGTAGTTGATGCG           | This study                |
| atp1cDdo     | <i>atp1</i>  | GAA ATG ACA TTG GTA GGA ATA TAA GC | This study                |
| atp1inup3    | <i>atp1</i>  | TCA ACG TGT TGC CAG ATA GAC G      | This study                |
| atp1indo     | <i>atp1</i>  | AAA GAT AGG CAG GTG GTA TGG        | This study                |
| atp1ido5     | <i>atp1</i>  | TGA CYA TRA TGT GCC TAT RGC        | This study                |
| matKup1      | <i>matK</i>  | AGACARACCGKATCRAAGWTGAACG          | This study                |
| matKdo1      | <i>matK</i>  | AATTTTTATYTRAYRGAKGGYAAACG         | This study                |

**Supplementary Table 2.** List of all detected RNA editing sites in *atp1* exons. The position labelling was set to “self”. For some taxa marked with an asterisk (\*) the RNA editing sites were predicted with the PREPACT alignment prediction tool (Lenz and Knoop 2013) using *Pteris umbrosa* cDNA as reference. Editing sites which are found in the CR clade and at least one other clade are considered to be plesiomorphic in the Pteridaceae and are shaded in green. Edits which are restricted to certain subclades of Pteridaceae, e. g. Pteridaceae without CR or AD/CH clade are shown in yellow. Edits which only occur in a single genus are shaded in blue.

**Supplementary Table 3. List of experimentally verified intronic RNA editing sites.** The intronic RNA editing sites were analyzed through a cDNA analysis of premature and unspliced mRNAs. Extending the usual nomenclature (Rüdinger et al. 2009) the intronic editing sites are named after the intron name, the type of RNA editing (eU for C-to-U and eC for U-to-C editing) and the intron nucleotide position.

| Species and clone name              | Gene        | Intronic RNA editing sites                                                                                            |
|-------------------------------------|-------------|-----------------------------------------------------------------------------------------------------------------------|
| <i>Pteris cretica</i> intronup1     | <i>atp1</i> | atp1i361g2eC285                                                                                                       |
| <i>Pteris cretica</i> introndo1     | <i>atp1</i> | atp1i361g2eU276, atp1i361g2eU385, atp1i361g2eU386; atp1i361g2eU506, atp1i361g2eC742                                   |
| <i>Pteris umbrosa</i> introndo1     | <i>atp1</i> | atp1i361g2eU276                                                                                                       |
| <i>Pteris vittata</i> intronup1     | <i>atp1</i> | atp1i361g2eU200, atp1i361g2eU271, atp1i361g2eC280                                                                     |
| <i>Pteris vittata</i> intronup2     | <i>atp1</i> | atp1i361g2eC280                                                                                                       |
| <i>Pteris vittata</i> introndo1     | <i>atp1</i> | atp1i361g2eU271, atp1i361g2eU380, atp1i361g2eU381, atp1i361g2eC397, atp1i361g2eU509, atp1i361g2eC590, atp1i361g2eU746 |
| <i>Pteris vittata</i> introndo2     | <i>atp1</i> | atp1i361g2eU271, atp1i361g2eU380, atp1i361g2eU381, atp1i361g2eU509, atp1i361g2eC590, atp1i361g2eU746                  |
| <i>Pteris vittata</i> introndo3     | <i>atp1</i> | atp1i361g2eU380, atp1i361g2eC513, atp1i361g2eC590                                                                     |
| <i>Pteris cretica</i> intronup1     | <i>rps3</i> | rps3i249g2eU590, rps3i249g2eU658                                                                                      |
| <i>Pteris argyraea</i> intronup1    | <i>rps3</i> | rps3i249g2eC346, rps3i249g2eU591, rps3i249g2eU658                                                                     |
| <i>Pteris argyraea</i> intronup2    | <i>rps3</i> | rps3i249g2eU591, rps3i249g2eU658                                                                                      |
| <i>Pteris vittata</i> intronup1     | <i>rps3</i> | rps3i249g2eU132, rps3i249g2eU597, rps3i249g2eU602, rps3i249g2eU670                                                    |
| <i>Pteris vittata</i> intronup2     | <i>rps3</i> | rps3i249g2eU132, rps3i249g2eU670                                                                                      |
| <i>Pteris vittata</i> intronup3     | <i>rps3</i> | rps3i249g2eU132, rps3i249g2eU632, rps3i249g2eU670                                                                     |
| <i>Pteris vittata</i> intronup4     | <i>rps3</i> | rps3i249g2eU132, rps3i249g2eU503, rps3i249g2eU670                                                                     |
| <i>Onychium japonicum</i> intronup1 | <i>rps3</i> | rps3i249g2C332, rps3i249g2eU583, rps3i249g2C647, rps3i249g2C651                                                       |

**Supplementary Table 4. Taxa and loci.** Additional database accessions of sequences investigated in this study are shown “-” indicates that no data are available. The respective epithet is indicated below the accession number when originating from a different species of the same genus.

| <b>Pteridaceae</b>                  | <b>rbcl</b>                      | <b>atpB</b>                      | <b>atpA</b>                            | <b>matK</b>                          | <b>atp1</b>                          |
|-------------------------------------|----------------------------------|----------------------------------|----------------------------------------|--------------------------------------|--------------------------------------|
| <i>Acrostichum danaeifolium</i>     | EF452129                         | EF452008                         | EF452065                               | -                                    | -                                    |
| <i>Adiantum malesianum</i>          | EF452132                         | EF452011                         | EF452068                               | -                                    | KC984412                             |
| <i>Adiantum tenerum</i>             | EF452134                         | EF452014                         | EF452072                               | -                                    | KC984415                             |
| <i>Adiantum tetraphyllum</i>        | EF452135                         | EF452015                         | EF452073                               | -                                    | KC984416                             |
| <i>Anetium citrifolium</i>          | U21284,                          | EF452017                         | EF452075                               | -                                    | KC984417                             |
| <i>Argyroschisma limitanea</i>      | EF452139                         | EF452019                         | EF452077                               | -                                    | -                                    |
| <i>Anogramma leptophylla</i>        | AY168715                         | -                                | -                                      | -                                    | -                                    |
| <i>Antrophyum latifolium</i>        | EF452138                         | EF452018                         | EF452076                               | -                                    | KC984418                             |
| <i>Bommeria hispida</i>             | EF452142                         | EF452022                         | EF452081                               | -                                    | KC984419                             |
| <i>Ceratopteris richardii</i>       | AB059585                         | AY612691                         | EF452082                               | -                                    | -                                    |
| <i>Cheilanthes alabamensis</i>      | EF452143                         | EF452023                         | EF452083                               | -                                    | -                                    |
| <i>Cheilanthes eatonii</i>          | EF452144                         | EF452024                         | EF452084                               | -                                    | -                                    |
| <i>Cheilanthes nitidula</i>         | EF452146                         | EF452025                         | EF452085                               | -                                    | -                                    |
| <i>Cheilanthes viridis</i>          | EF452147                         | EF452026                         | EF452086                               | -                                    | -                                    |
| <i>Coniogramme fraxinea</i>         | AM177359                         | AY612693                         | AM176470                               | -                                    | -                                    |
| <i>Cryptogramma crispa</i>          | EF452148                         | EF452027                         | EF452087                               | -                                    | KC984421                             |
| <i>Doryopteris sagittifolia</i>     | EF452151                         | EF452032                         | EF452093                               | -                                    | -                                    |
| <i>Eriosorus cheilanthisoides</i>   | EF452152                         | EF452034                         | EF452095                               | -                                    | -                                    |
| <i>Haplopteris elongata</i>         | EF452153                         | EF452035                         | EF452096                               | -                                    | KC984423                             |
| <i>Hecistopteris pumila</i>         | U21286                           | EF452036                         | EF452097                               | -                                    | KC984424                             |
| <i>Jamesonia verticalis</i>         | EF452155                         | EF452038                         | EF452099                               | -                                    | -                                    |
| <i>Llavea cordifolia</i>            | U27726                           | EF452039                         | EF452100                               | -                                    | -                                    |
| <i>Monachosorum henryi</i>          | U05932                           | AY612706                         | AM176469                               | -                                    | -                                    |
| <i>Monogramma graminea</i>          | EF452157                         | EF452040                         | EF452102                               | -                                    | KC984428                             |
| <i>Nephrolepis cordifolia</i>       | U05933                           | EF452041                         | EF452103                               | -                                    | -                                    |
| <i>Neurocallis praestantissima</i>  | EF452158                         | EF452042                         | EF452104                               | -                                    | -                                    |
| <i>Notholaena aschenborniana</i>    | EF452159                         | EF452043                         | EF452105                               | -                                    | -                                    |
| <i>Ochropteris pallens</i>          | EF452160                         | EF452044                         | EF452106                               | -                                    | -                                    |
| <i>Pellaea intermedia</i>           | EF452163                         | EF452047                         | EF452109                               | -                                    | -                                    |
| <i>Pellaea truncata</i>             | EF452164                         | EF452048                         | EF452110                               | -                                    | -                                    |
| <i>Pentagramma triangularis</i>     | EF452165                         | EF452049                         | EF452111                               | -                                    | KC984431                             |
| <i>Pityrogramma austroamericana</i> | EF452166                         | EF452050                         | EF452112                               | -                                    | KC984432                             |
| <i>Platyzoa microphyllum</i>        | AY168721                         | EF452051                         | EF452113                               | -                                    | -                                    |
| <i>Polytaenium cajenense</i>        | U20934                           | EF452052                         | EF452114                               | -                                    | -                                    |
| <i>Pteris arborea</i>               | EF452168                         | EF452053                         | EF452116                               | -                                    | -                                    |
| <i>Pteris multifida</i>             | EF452171                         | EF452056                         | EF452119                               | -                                    | -                                    |
| <i>Pteris propinqua</i>             | EF452172                         | EF452057                         | EF452120                               | -                                    | -                                    |
| <i>Pteris tremula</i>               | EF452174                         | EF452059                         | EF452122                               | -                                    | -                                    |
| <i>Pterozonium brevifrons</i>       | EF452175                         | EF452061                         | EF452124                               | -                                    | -                                    |
| <i>Radiovittaria gardneriana</i>    | U21294                           | EF452062                         | EF452125                               | -                                    | -                                    |
| <i>Vittaria graminifolia</i>        | U21295                           | EF452064                         | EF452128                               | -                                    | KC984434                             |
| <i>Rheopteris cheesmaniae</i>       | EF452176                         | EF452063                         | EF452126                               | -                                    | KC984433                             |
| <b>Outgroups</b>                    |                                  |                                  |                                        |                                      |                                      |
| <i>Anemia phyllitidis</i>           | AJ303391                         | AY612687                         | AM176474                               | JF303905                             | KJ944577                             |
| <i>Asplenium nidus</i>              | U05907                           | AY612688                         | DQ390545<br><i>A. theciferum</i>       | JF303923<br><i>A. tripteropus</i>    | KJ944566                             |
| <i>Asplenium unilaterale</i>        | EF452140                         | EF452020                         | EF452078                               | -                                    | -                                    |
| <i>Blechnum occidentale</i>         | U05910                           | U93838                           | EF452080                               | AJ548851                             | -                                    |
| <i>Botrychium lunaria</i>           | L13474<br><i>B. biternatum</i>   | AY612689                         | DQ390549                               | KP757848                             | DQ110159                             |
| <i>Cyathea poeppigii</i>            | AF313585                         | AF313553                         | EF463640                               | JF303907<br><i>C. dealbata</i>       | KP757843<br><i>C. dealbata</i>       |
| <i>Cystopteris reevesiana</i>       | EF452149                         | EF452028                         | EF452088                               | -                                    | -                                    |
| <i>Davallia solida</i>              | AB212712                         | EF452029                         | EF452089                               | -                                    | -                                    |
| <i>Dennstaedtia punctilobula</i>    | U05918                           | U93836                           | EF452090                               | -                                    | -                                    |
| <i>Didymochlaena truncatula</i>     | AF425105                         | EF452030                         | EF452091                               | -                                    | -                                    |
| <i>Dryopteris aemula</i>            | AY268881                         | EF452033                         | EF452094                               | DQ646243<br><i>D. wallichiana</i>    | -                                    |
| <i>Equisetum bogotense</i>          | KP75784                          | AY226139                         | KC893871                               | KP757844                             | -                                    |
| <i>Equisetum hyemale</i>            | NC020146                         | DQ646213                         | -                                      | -                                    | -                                    |
| <i>Gleichenia dicarpa</i>           | AF313584                         | AF313550                         | DQ390562                               | HM021798<br><i>G. japonica</i>       | KJ944572                             |
| <i>Helminthostachys zeylanica</i>   | EU352293                         | DQ646095                         | -                                      | KP757847                             | DQ110149                             |
| <i>Hymenophyllum hirsutum</i>       | AF275645                         | AF313538                         | DQ390565                               | JF303898<br><i>H. trichomanoides</i> | DQ646226<br><i>H. trichomanoides</i> |
| <i>Leptopteris superba</i>          | AY612678<br><i>L. wilkesiana</i> | AY612699<br><i>L. wilkesiana</i> | DQ390566<br><i>L. hymenophylloides</i> | KM925081                             | KJ944576                             |



|                                  |                                 |                                 |                                 |                              |                                  |
|----------------------------------|---------------------------------|---------------------------------|---------------------------------|------------------------------|----------------------------------|
| <i>Lygodium japonicum</i>        | KF225593                        | KF225593                        | KF225593                        | KF225593                     | KP757845                         |
| <i>Marattia laevis</i>           | AF313581<br><i>M. attenuata</i> | AF313546<br><i>M. attenuata</i> | DQ390567<br><i>M. alata</i>     | KM925080                     | KJ944578                         |
| <i>Marsilea drummondii</i>       | EU352306                        | AF313551                        | EF463786                        | HM021801<br><i>M. mutica</i> | KJ944563<br><i>M. hirsuta</i>    |
| <i>Matonia pectinata</i>         | EU352307                        | AY612704                        | DQ390568                        | JF303903                     | KJ944573                         |
| <i>Microlepia platyphylla</i>    | U18642                          | U93832                          | EF452101                        | -                            | -                                |
| <i>Ophioglossum californicum</i> | KC117178                        | KC117178                        | KC117178                        | KC117178                     | KJ944573<br><i>O. petiolatum</i> |
| <i>Pteridium aquilinum</i>       | HM535629                        | HM535629                        | HM535629                        | HM535629                     | AJ548852                         |
| <i>Pteridium esculentum</i>      | U05940                          | U93834                          | EF452115                        | -                            | -                                |
| <i>Psilotum nudum</i>            | AP004638                        | AP004638                        | AP004638                        | AP004638                     | AJ548873                         |
| <i>Salvinia molesta</i>          | EU269668                        | AF313552                        | DQ390576<br><i>S. cucullata</i> | JF303906                     | KJ944562                         |
| <i>Schizaea dichotoma</i>        | AY612683                        | AY612709                        | EF463861                        | JF303899                     | n.d.                             |
| <i>Tmesipteris elongata</i>      | EU352294                        | U93823                          | DQ390579                        | KJ569699                     | KJ944579                         |
| <i>Thelypteris palustris</i>     | U05947                          | AY612713                        | EF452127                        | -                            | -                                |

## References

- Knie N, Fischer S, Grewe F, Polsakiewicz M, Knoop V. 2015. Horsetails are the sister group to all other monilophytes and Marattiales are sister to leptosporangiate ferns. *Mol. Phylogenet. Evol.* 90:140–149.
- Lenz H, Knoop V. 2013. PREPACT 2.0: Predicting C-to-U and U-to-C RNA Editing in Organelle Genome Sequences with Multiple References and Curated RNA Editing Annotation. *Bioinform Biol Insights.* 7:1–19.
- Pryer KM, Schuettpelz E, Wolf PG, Schneider H, Smith AR, Cranfill R. 2004. Phylogeny and evolution of ferns (monilophytes) with a focus on the early leptosporangiate divergences. *American journal of botany.* 91(10):1582–1598.
- Rüdinger M, Funk HT, Rensing SA, Maier UG, Knoop V. 2009. RNA editing: only eleven sites are present in the *Physcomitrella patens* mitochondrial transcriptome and a universal nomenclature proposal. *Molecular genetics and genomics: MGG.* 281(5):473–481.
- Schuettpelz E, Korall P, Pryer KM. 2006. Plastid atpA Data Provide Improved Support for Deep Relationships among Ferns. *Taxon.* 55(4):897–906.
